# Supplementary material for: Engineering of ZSM-5 zeolite crystals for enhanced lifetime in the production of light olefins via 2-methyl-2-butene cracking
Source: Royal Society of Chemistry journal article supplement (doi:10.1039/c6cy01009a), 2016-10-04
Supplement: c6cy01009a1.pdf [file c6cy01009a1.pdf]

## Electronic Supplementary Information

### Engineering of ZSM-5 zeolite crystals for enhanced lifetime in the production of light olefins *via* 2-methyl-2-butene cracking

Sharon Mitchell, Marilyn Boltz, Jiaxu Liu, and Javier Pérez-Ramírez\*

Institute for Chemical and Bioengineering, Department of Chemistry and Applied Biosciences, ETH Zurich, Vladimir-Prelog-Weg 1, CH 8093, Zurich, Switzerland.

\*E-mail: [jpr@chem.ethz.ch](mailto:jpr@chem.ethz.ch)

**Table S1.** Average product selectivity evidenced over the zeolite catalysts during a single catalytic cycle in the conversion of methanol to olefins. Conditions:  $T = 723$  K,  $P = 1$  bar,  $WHSV = 6 \text{ g}_{\text{MeOH}} \text{ g}_{\text{zeolite}}^{-1} \text{ h}^{-1}$ .

| Sample | Lifetime <sup>a</sup><br>(h) | $S_{\text{C2=}}^b$<br>(Cmol%) | $S_{\text{C3=}}^b$<br>(Cmol%) | $S_{\text{C4=}}^b$<br>(Cmol%) | $STY^c$<br>( $\text{g}_{\text{C2-4}} \text{ g}_{\text{zeolite}}^{-1} \text{ h}^{-1}$ ) | $S_{\text{C1-3alk}}^b$<br>(Cmol%) | $S_{\text{C4-7alk}}^b$<br>(Cmol%) | $S_{\text{C6-8ar}}^b$<br>(Cmol%) |
|--------|------------------------------|-------------------------------|-------------------------------|-------------------------------|----------------------------------------------------------------------------------------|-----------------------------------|-----------------------------------|----------------------------------|
| OH-M   | 18                           | 10                            | 27                            | 17                            | 3.28                                                                                   | 5                                 | 32                                | 10                               |
| OH-M-H | 39                           | 14                            | 25                            | 9                             | 2.64                                                                                   | 4                                 | 31                                | 9                                |
| OH-N   | 27                           | 8                             | 20                            | 12                            | 2.38                                                                                   | 7                                 | 36                                | 15                               |
| OH-N-H | 54                           | 8                             | 20                            | 10                            | 2.25                                                                                   | 4                                 | 37                                | 10                               |
| F-M    | 19                           | 10                            | 21                            | 12                            | 2.59                                                                                   | 6                                 | 26                                | 15                               |
| F-N    | 25                           | 9                             | 22                            | 13                            | 2.64                                                                                   | 4                                 | 27                                | 13                               |
| F-N-H  | 42                           | 7                             | 24                            | 11                            | 2.49                                                                                   | 3                                 | 33                                | 9                                |

<sup>a</sup> Time on stream during which  $X_{\text{MeOH}} > 80\%$ . <sup>b</sup> Selectivity to ethene ( $S_{\text{C2=}}$ ), propene ( $S_{\text{C3=}}$ ), butenes ( $S_{\text{C4=}}$ ), light alkanes ( $S_{\text{C1-3alk}}$ ), gasoline-range alkanes ( $S_{\text{C4-7alk}}$ ), and to benzene, toluene, and xylene aromatics ( $S_{\text{C6-8ar}}$ ). <sup>c</sup> Space-time yield of C2-4 olefins.

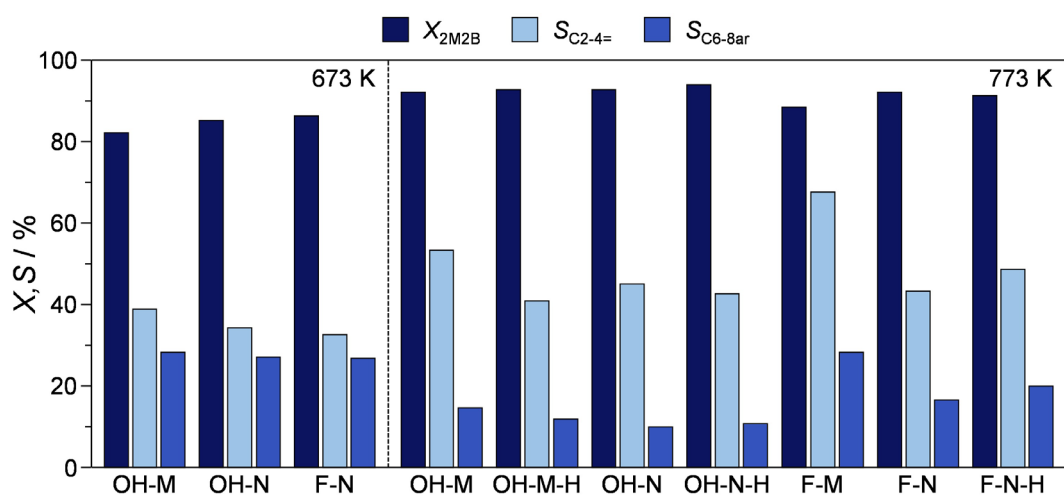

**Figure S1.** Conversion and selectivity over selected ZSM-5 catalysts in 2M2B cracking at different temperatures. Conditions:  $t = 2$  h,  $P = 1$  bar,  $WHSV = 12 \text{ g}_{2M2B} \text{ h}^{-1} \text{ g}_{\text{catalyst}}^{-1}$ .

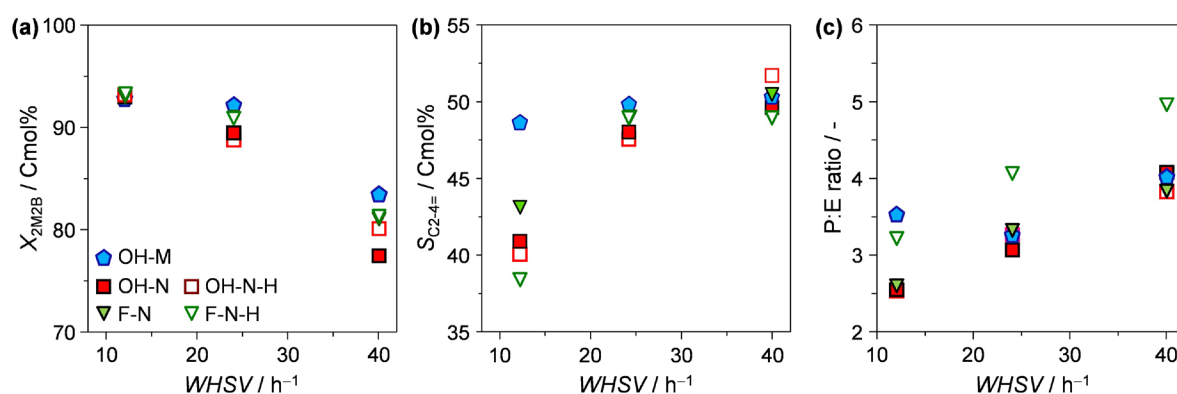

**Figure S2.** (a) Conversion, (b) olefin selectivity, and (c) the propylene:ethylene ratio in 2M2B cracking over selected ZSM-5 catalysts *versus* the weight hourly space velocity. Conditions:  $t = 2$  h,  $T = 773$  K,  $P = 1$  bar.

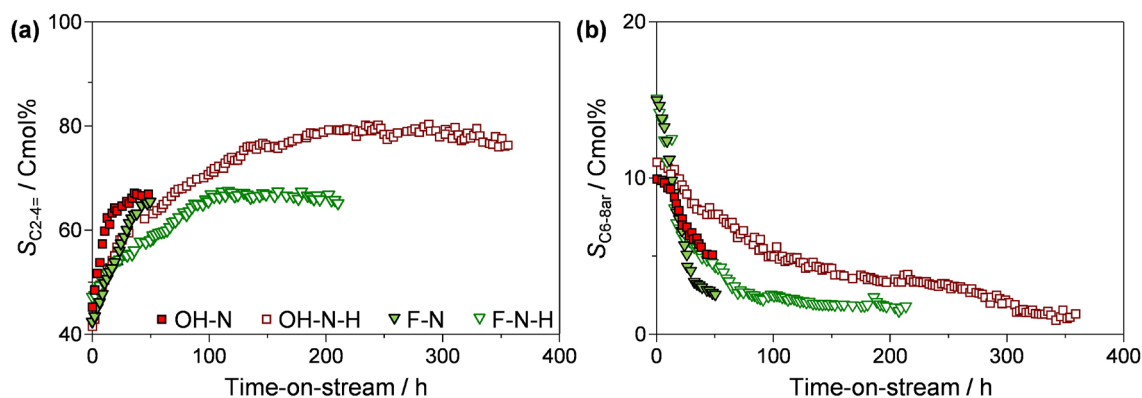

**Figure S3.** Selectivity to (a) light olefins ( $S_{C2-4=}$ ) or (b) aromatics ( $S_{C6-8ar}$ ) *versus* time-on-stream in 2M2B cracking over the nanosized zeolites and their desilicated analogues. Conditions:  $T = 773$  K,  $P = 1$  bar,  $WHSV = 12 \text{ g}_{2M2B} \text{ g}_{zeolite}^{-1} \text{ h}^{-1}$ .

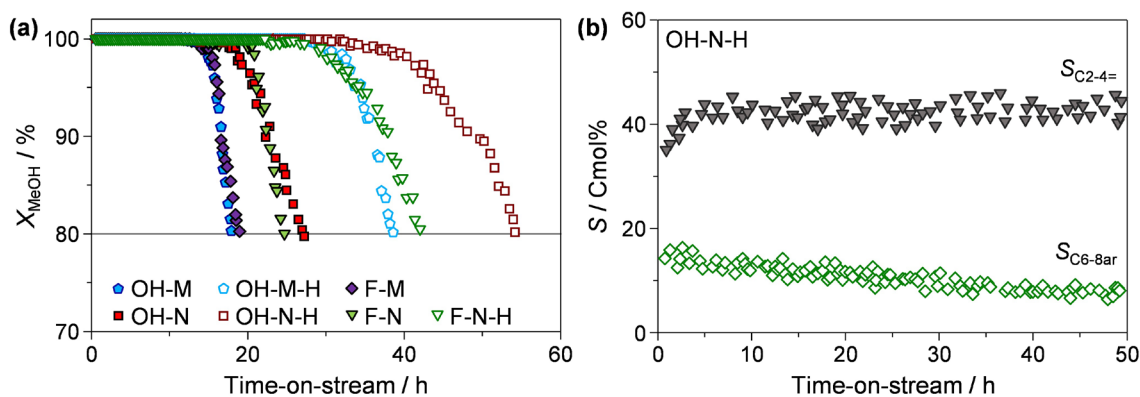

**Figure S4.** (a) Conversion and (b) selectivity to light olefins ( $S_{C2-4=}$ ) or aromatics ( $S_{C6-8ar}$ ) *versus* time-on-stream in the conversion of methanol to olefins over the ZSM-5 zeolites studied. The grey line indicates the degree of conversion at which a single catalytic cycle was defined. Conditions:  $T = 723$  K,  $P = 1$  bar,  $WHSV = 6 \text{ g}_{MeOH} \text{ g}_{zeolite}^{-1} \text{ h}^{-1}$ .
